# Supplementary material for: BIRC6 mediates imatinib resistance independently of Mcl-1
Source: PubMed Central journal article supplement (PMC5433768; doi:10.1371/journal.pone.0177871), 2017-05-16
Supplement: pone.0177871.s001.pdf [file pone.0177871.s001.pdf]

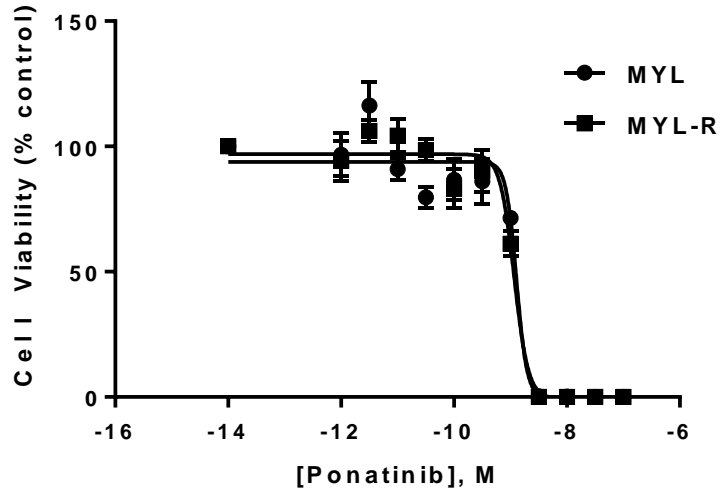

**S1 Fig. Ponatinib is effective against imatinib-resistant CML cells (MYL-R).**

MYL and MYL-R cells were cultured in triplicate in 96-well plates with increasing concentrations of ponatinib for 72 hours, and cell viability was assessed by MTS assay. MYL and MYL-R showed no difference in ponatinib sensitivity with IC<sub>50</sub> values of ~1.3 nM and ~1.2 nM respectively.
